# Supplementary material for: Modulation of the biocatalytic activity and selectivity of CeO2 nanozymes via atomic doping engineering
Source: Royal Society of Chemistry journal article supplement (doi:10.1039/d2nr05742e), 2023-01-01
Supplement: d2nr05742e1.pdf [file d2nr05742e1.pdf]

## Supporting Information

# Modulation of Biocatalytic Activity and Selectivity of CeO<sub>2</sub> Nanozyme via Atomic Doping Engineering

*Shaofang Zhang<sup>a</sup>, Haiyan Ruan<sup>b</sup>, Qi Xin<sup>a</sup>, Xiaoyu Mu<sup>\*,a</sup>, Hao Wang<sup>\*,a</sup>, Xiao-Dong Zhang<sup>\*,a,b</sup>*

<sup>a</sup> Tianjin Key Laboratory of Brain Science and Neural Engineering, Academy of Medical Engineering and Translational Medicine, Tianjin University, Tianjin 300072, China

<sup>b</sup> Department of Physics and Tianjin Key Laboratory of Low Dimensional Materials Physics and Preparing Technology, School of Sciences, Tianjin University, Tianjin 300350, China.

\*Correspondence to Xiaodong Zhang, Email: [xiaodongzhang@tju.edu.cn](mailto:xiaodongzhang@tju.edu.cn). Xiaoyu Mu, Email: [muxiaoyu@tju.edu.cn](mailto:muxiaoyu@tju.edu.cn); Hao Wang, Email: [hao\\_wang@tju.edu.cn](mailto:hao_wang@tju.edu.cn).

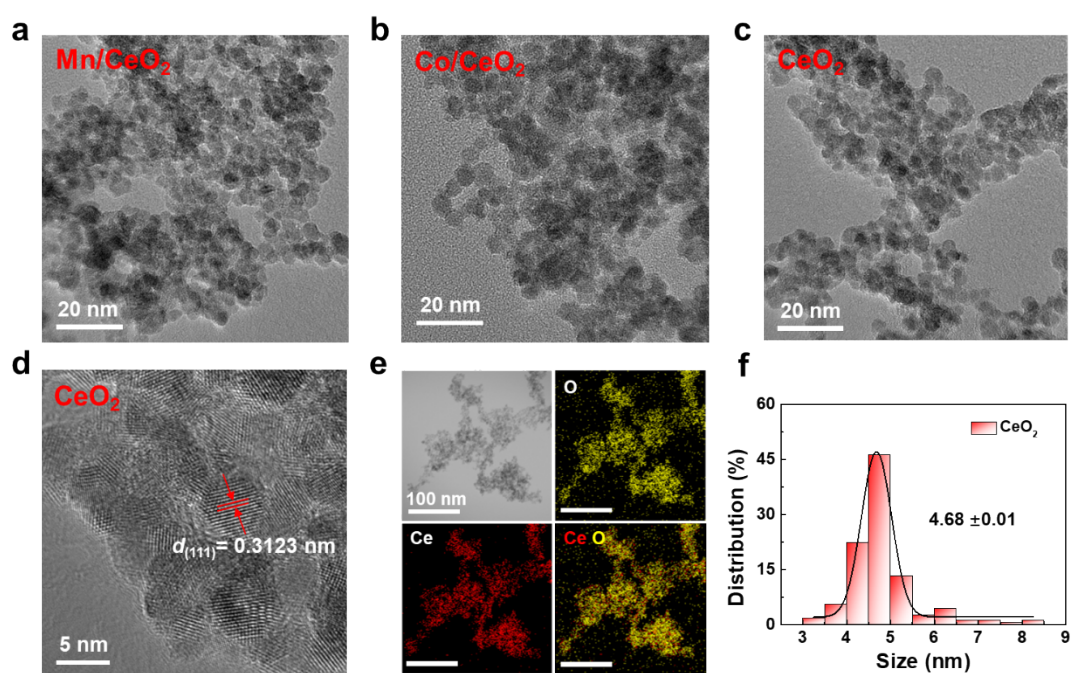

**Figure S1.** TEM images of (a) Mn/CeO<sub>2</sub>, (b) Co/CeO<sub>2</sub>, and (c) CeO<sub>2</sub>. (d) The high-resolution TEM and (e) corresponding EDS mapping images of CeO<sub>2</sub>. (f) The size of CeO<sub>2</sub>.

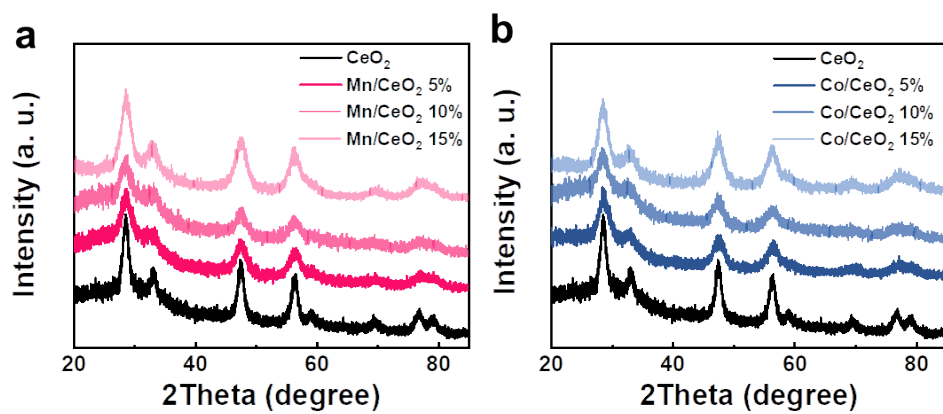

**Figure S2.** XRD spectra of (a) Mn/CeO<sub>2</sub> and (b) Co/CeO<sub>2</sub> with different doping ratios.

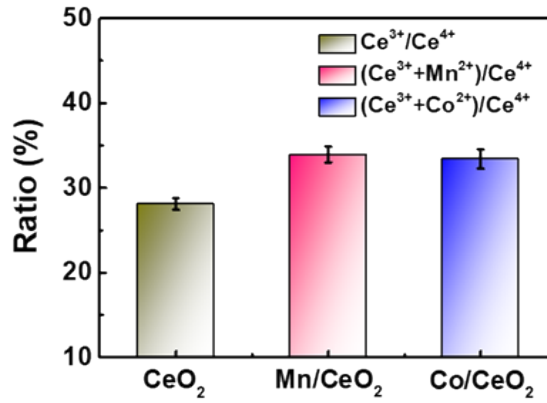

**Figure S3.** Ratio of  $\text{Ce}^{3+}/\text{Ce}^{4+}$  or  $(\text{Ce}^{3+}+\text{M}^{2+})/\text{Ce}^{4+}$  in  $\text{CeO}_2$  and  $\text{M}/\text{CeO}_2$  nanozymes. The results confirmed that the ratios of  $(\text{Mn}^{2+}+\text{Ce}^{3+})/\text{Ce}^{4+}$  and  $(\text{Co}^{2+}+\text{Ce}^{3+})/\text{Ce}^{4+}$  in  $\text{M}/\text{CeO}_2$  nanozymes were higher than the  $\text{Ce}^{3+}/\text{Ce}^{4+}$  in undoped  $\text{CeO}_2$  nanozymes. The  $\text{Mn}^{2+}$  or  $\text{Co}^{2+}$  may accelerate the catalytic rate by participating in catalytic reactions similar to  $\text{Ce}^{3+}$ , while also promoting the conversion of more  $\text{Ce}^{4+}$  to  $\text{Ce}^{3+}$ , which is energetically favorable. For the POD-like activity of  $\text{CeO}_2$ , the reaction path is as follows:

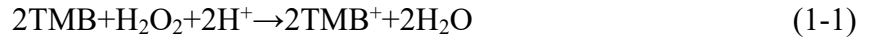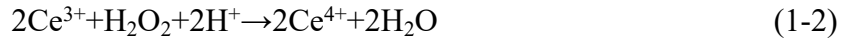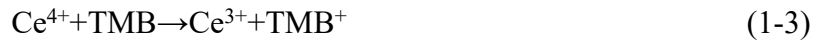

The specific reactions in which  $\text{Mn}^{2+}$  or  $\text{Co}^{2+}$  may be involved are speculated as follows:

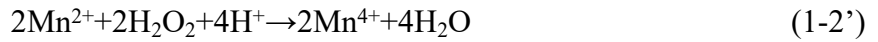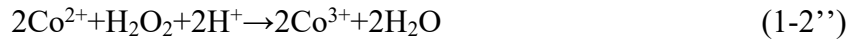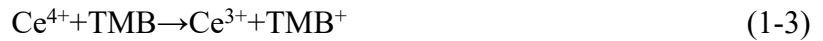

Thus, the doping of  $\text{Mn}^{2+}$  or  $\text{Co}^{2+}$  may enhanced the catalytic activity by forming new active sites and participating in catalytic reactions.

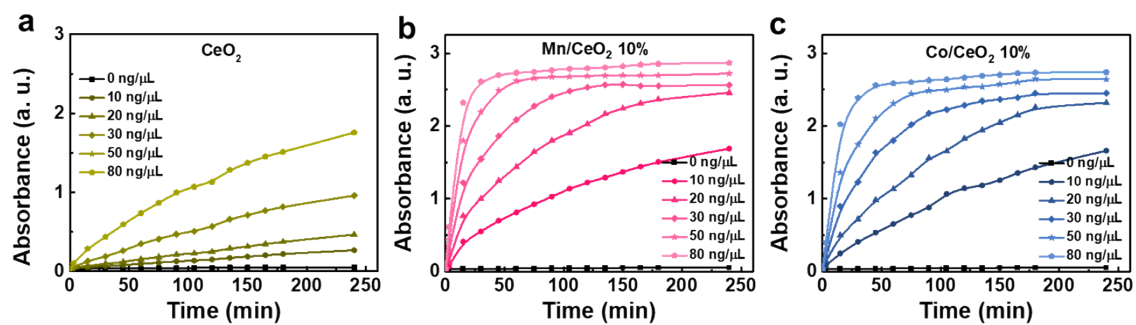

**Figure S4.** Reaction-time curves of the TMB color development reaction catalyzed by (a)  $\text{CeO}_2$ , (b)  $\text{Mn/CeO}_2$  and (c)  $\text{Co/CeO}_2$  with different concentrations.

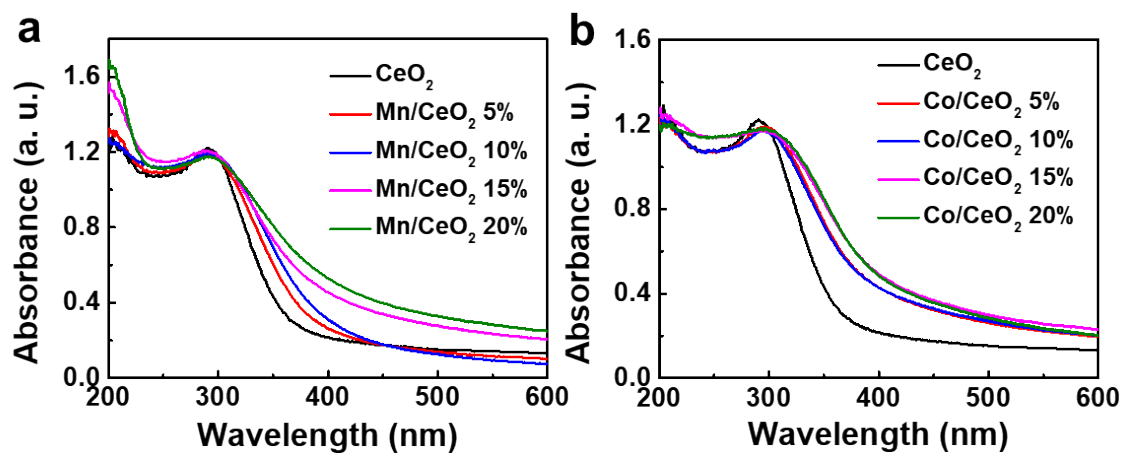

**Figure S5.** UV-vis absorption spectra of (a) Mn/CeO<sub>2</sub> and (b) Co/CeO<sub>2</sub> with different doping ratios.

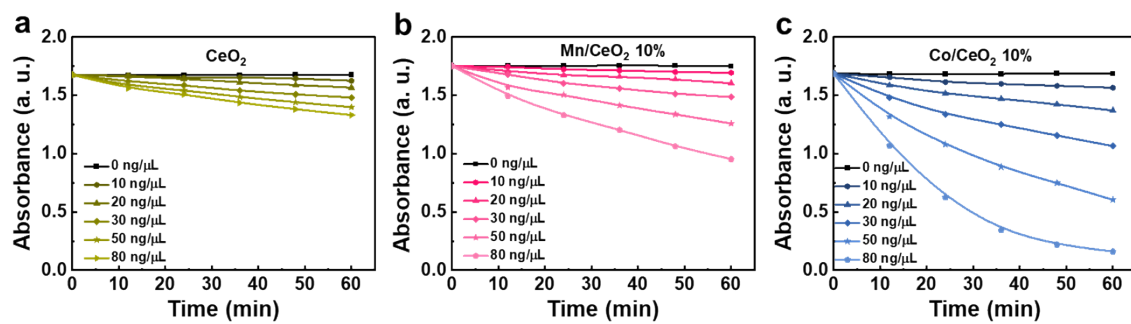

**Figure S6.** Reaction-time curves of the decomposition of  $\text{H}_2\text{O}_2$  catalyzed by (a)  $\text{CeO}_2$ , (b)  $\text{Mn/CeO}_2$  and (c)  $\text{Co/CeO}_2$  with different concentrations.

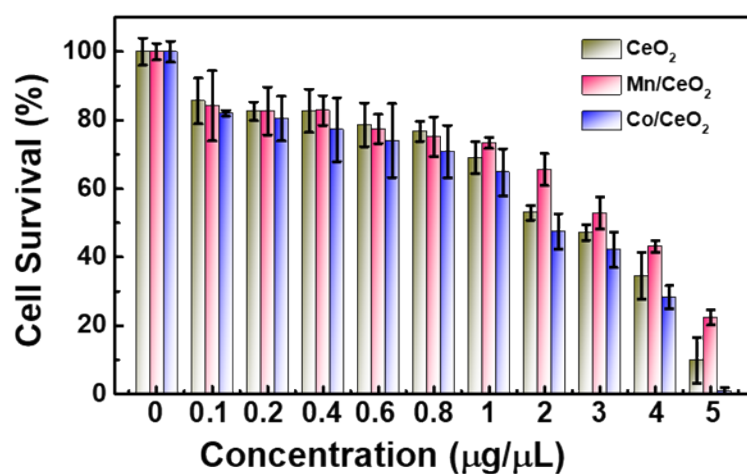

**Figure S7.** Cytotoxicity of HT22 cells treated with CeO<sub>2</sub> and M/CeO<sub>2</sub> at 0.1-10 μg/μL determined by MTT assays.

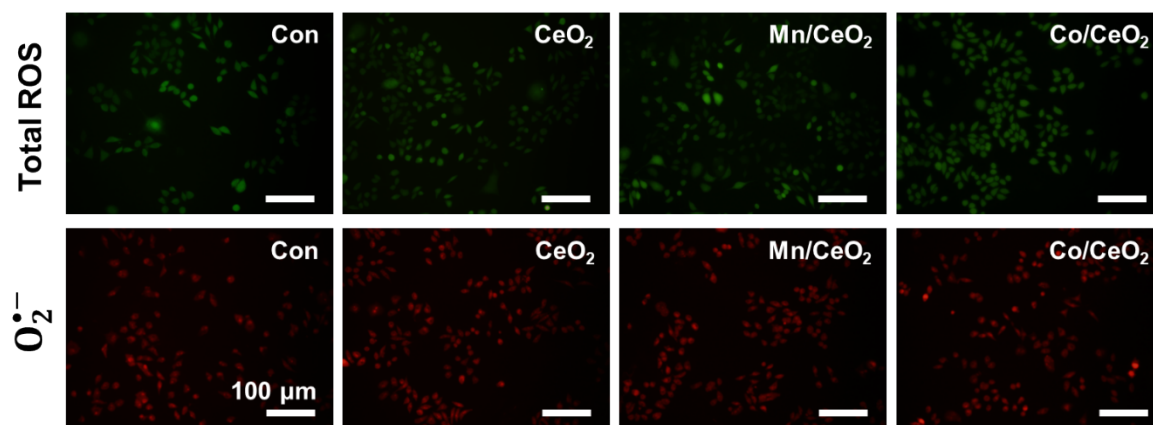

**Figure S8.** Fluorescence microscopic images of intracellular total ROS and O<sub>2</sub><sup>•-</sup> levels treated with or without nanozymes using DCFH-DA and DHE fluorescent probes, respectively.

**Table S1.** Quantification of elemental contents of CeO<sub>2</sub> and M/CeO<sub>2</sub> nanozymes by EDS element mapping.

| Samples             | Ce   |       | O    |       | Mn   |      | Co   |      |
|---------------------|------|-------|------|-------|------|------|------|------|
|                     | At.% | Wt.%  | At.% | Wt.%  | At.% | Wt.% | At.% | Wt.% |
| CeO <sub>2</sub>    | 20.8 | 69.67 | 79.2 | 30.33 |      |      |      |      |
| Mn/CeO <sub>2</sub> | 19.1 | 65.91 | 78.4 | 31.39 | 2.5  | 2.8  |      |      |
| Co/CeO <sub>2</sub> | 24.1 | 70.3  | 70.9 | 23.6  |      |      | 5.0  | 6.1  |
